# Supplementary material
Source: HighWire-hosted journal article supplement (https://erj.ersjournals.com/content/53/6/1801520)
Supplement: inline-supplementary-material-1 [file inline-supplementary-material-1.pdf]

| Level of confidence | Number of ratings | Correct (%) | False (%) |
|---------------------|-------------------|-------------|-----------|
| Good                | 120               | 95          | 5         |
| Moderate            | 95                | 89.5        | 10.5      |
| Poor                | 23                | 73.9        | 26.1      |

**Table online supplement**

Rater performance (n=7) and confidence level in interpreting nCLE imaging of lung tumors and mediastinal lymph nodes involved in lung cancer.
